# Supplementary material
Source: publisher figshare collection journal article supplement (https://acs.figshare.com/ndownloader/files/5813025)
Supplement: Supplementary file 1 [file 5813025]

(This file must be converted with BinHex 4.0)

:#N&'36*TGLj$-d3!2cmr2bdY,5d!!!!!!k)!!!!!fiP3Bd4159F4!"%!#3!!!!!
!G(*KBm`!!!!$&2rr-BlqrakA!!#C"IlrRZMpra1m!!"#d2cr!(Iqrhc#!!$["rl
r,p(mra[D!!#Gq[[r3HIpra$K!!""Y2cr'AMrrkHS!!"cK`%!Fmhprd#!!!"A-!)
!DZAqreG@!!$MV3%!4"F!!$Sq!!!,K!!!0rEprpk0!!!N43-!0XMqrd4'!!!&U`!
!H$B!!04-!!"q63)!S[!!!2XE!!!Y@`-!qeJ#!*(MrrmdcJ)!d5i$!#DZrrqZj`-
!j*%#!(ki!!"L"33!`cm#!1mHrrpNEQpLCJ!!!!!!!3!"!!%!!`!"!!%!!J!"!!)
!"!!"!!)!"3!"!!d!%!!"!!N!"J!"!!B!"`!"!!F!#J!"!!F!#!!"!!J!#`!"!!J
!$!!"!!d!$`!"!!d!$J!"!!d!$!!!%!!!#3!!%!!!#`!!%'*YHA0%!!!!!8m!!!&
$!!!"6J!!!8J!!!&)!!!"5!!!!8m!!!&$!!!"6J!!!8J!!!&)!!!"5!!!!8J!!!&
1!!!"5!!!!8J!!!&)!!"3@94`+`!!!!!!D@aj3fPXEe-"!!$r!2m!r`!!!!!!!"N
!(J"N!#3!!3%"&!!%!!)!"3!!EP*DF!3!!!$kJ3N!9%j*F(B"!!!!!2lrr[rqr`!
!!!#e!!!!Y3!!!,8!!3$qrrlrr[m!!!!!Y3!!!,8!!!#e!!)!r[rqrrlr!!!!!,8
!!!#e!!!!Y3!$!2lrr[rqr`!!!!#e!!!!Y3!!!,8!"!$qrrlrr[m!!!!!Y3!!!,8
!!!#e!!8!r[rqrrlr!!!!!,8!!!#e!!!!Y3!'!2lrr[rqr`!!!!#e!!!!Y3!!!,8
!"`$qrrlrr[m!!!!!Y3!!!,8!!!#e!!J!r[rqrrlr!!!!!,8!!!#e!!!!Y3!*!2l
rr[rqr`!!!!#e!!!!Y3!!!,8!#J$qrrlrr[m!!!!!Y3!!!,8!!!#e!!X!r[rqrrl
r!!!!!,8!!!#e!!!!Y3!-!2lrr[rqr`!!!!#e!!!!Y3!!!,8!$3$qrrlrr[m!!!!
!Y3!!!,8!!!#e!!i!r[rqrrlr!!!!!,8!!!#e!!!!Y3!2!2lrr[rqr`!!!!#e!!!
!Y3!!!,8!%!$qrrlrr[m!!!!!Y3!!!,8!!!#e!'4ZBR!1!!!!!!"%6NPAA3"V!03
"iJ&36N4`%J!!!!!!4%j*9a3!#J!"!!!!!3!X!@4ZBR31!!!!!!"%6NPASJ"'!))
"D!#qK3!!:
